# Supplementary material
Source: PubMed Central journal article supplement (PMC2657387)
Supplement: 0812847106_0812847106SI.pdf [file 0812847106_0812847106SI.pdf]

# Supporting Information

Philipp et al. 10.1073/pnas.0812847106

## SI Materials and Methods

### Cloning

**Wnt5.** Two Wnt5-related fragments (accession nos. CN631317 and CN630976) were detected in Hydra EST collections, and their sequence information was used for further cloning. To characterize the 5' end of the *hvwnt5* mRNA, repeated 5' RACE was done by using the SMART RACE cDNA Amplification Kit (Clontech). The complete *hvwnt5* coding region was cloned by PCR using *H. vulgaris* cDNA. RACE- Primers: Wnt5-R5, CACAACACAAACGACCGCATTC; Wnt5-R4, CGTCTTTGATGCATTCTCGACC; Wnt5-R8, CCCATGACAACGCATTGGATC; Wnt5-R7, CTGCCATCTCCCTGCTTCGT; Wnt5-R6, GTGAAGGTTTATTAACTCTTCC; Wnt5-R12, GCTGTTTCACGAGTTCCAAGTGG; Wnt5-R11, CGAGTTCCAAGTGGCATGTAAGG. PCR-Primers, Wnt5-ESTeF, GGATATCAGCTAGAGCAACTCC; Wnt5-ESTeR, CGCAAACATGGGTTATTTTCG; Wnt5-mRNAF3, GAA-GATGGCAAATCACCAAAG; Wnt5-mRNAF4, AAAAA-GAAGATGGCAAATCA; HyWnt5-R3, GACCTCCGTTCCAAATGAACC; HyWnt5-R4, CGTCTTTGATGCAT-TCTCGACC.

**Wnt8.** Two Wnt8/11-related fragments (accession nos. CN552348 and CN552013) were detected in Hydra EST collections, and their sequence information was used for further cloning. To characterize the 5' end of the *hvwnt8* mRNA, 5' RACE was done by using the 5' RACE Gene Racer Kit (Invitrogen). To clone the corresponding 3' end, 3' RACE was done by using the classic Frohmann method. RACE-Primers: Wnt11-4, GAA-GAAAGTGAAGATTTCCAGC; Wnt11-3, CTTGAACAATAGCCGGAGAGTCC; Wnt11-mRNAF3, CAATGCAAAATGGATAGA; Wnt11-mRNAF4, AAAATCAATGCAAAATGGAT; Wnt11-3, CTTGAACAATAGCCGGAGAGTCC; Wnt11-ESTaF, TATGCAGTTCAATGGCGGCAC; Wnt11-ESTaR, TGCTCTGTGTACTGGGATCCG; Wnt11-ESTeR2, GATTGCACGTTTACTCGACAC.

**Frizzled2.** A partial cDNA clone (accession no. DT614590) encoding a Frizzled protein fragment was identified in the *Hydra magnipapillata* EST collection in the NCBI database. The entire ORF of the corresponding transcript was retrieved from contig 36976 of the *H. magnipapillata* genome assembly. In BLAST searches, the predicted amino acid sequence showed highest similarity to members of the Frizzled 2/5/8 subfamily. Using sequence-specific primers (Fz2fwd, CGTTATAATCCATCTGCTCTG; Fz2rev, GCTAGATATTGTACCGTTGGTCC), a DNA fragment of 1,023-bp length was amplified by PCR from a random-prime *Hydra* cDNA, cloned in *Escherichia coli*, and used to produce a DIG-labeled RNA probe for in situ hybridization.

**Rho-associated kinase (Rok).** HvRok was identified in a PCR approach by using degenerated primers against the highly conserved N-terminal part. The complete ORF of the *hvrok* mRNA was then characterized by using 5' and 3' RACE experiments. Degenerated PCR primers: Rok2, GCNTTYTTYTG-GARGA; Rok6, CANGTNCRAARTCNGC. RACE primers, Rok7, AATGAATCGCCATAATCCATTGAG; Rok9, AATGAATCGCCATAATCCATTGAG; Rok11, TCATAAGTATGGCTATGTTACACAG; Rok12, GACATAAAACCAGACAACATGCTG; Rok14, GGAAATCATTGTTGCCATT-CATTGG; Rok15, GGAGGAAATCAGGGAACATCTG; Rok17, AAAGTGATGCCAATGCCATGC; Rok19, GCCTT-TGGAATCAAGCTCCATC; Rok20, GAAACAATATG-TAGTTGTAAGCCGG; Rok21, GCAACTAATACACCTTC-

TATGATC; Rok23, GCTGCTGAATGTCGAAGATGTCG; Rok25, AACTGTTGATCTTGCTACTGCC.

**Strabismus (Stbm).** HvStbm was identified in a PCR approach by using degenerated primers against conserved motifs in the middle part of the protein. The complete ORF of the *hvrok* mRNA was then characterized by using 5' and 3' RACE experiments. Degenerated PCR primers: Stbm1, GCNGCNGC-NMGMNMG; Stbm2, ACNANNCNGCMNCGGTA; Stbm3, GARGANGNTTYWSNCA; Stbm4, ACNSWYTT-NCGNAGRAG. RACE primers, Stbm5, AGTGCTTTCTT-GAACCATCTAA; Stbm6, TCTCTAACACATTTACAG-CAGC; Stbm7, GAAGTAGGACGTGGAAGGTATGG.

**Carbon Labeling and Morphometric Measurements.** Clusters of 20 to 30 ectodermal epithelial cells close to the base of early evaginating buds and tentacles were vitally labeled by injecting ink (Pelikan) into the interstitial spaces of the ectoderm cell layer. Epithelial cells incorporate and permanently store ink (carbon) particles within vacuoles; 2 h after labeling ( $t_0$ ), and after 3 days ( $t_3$ ), the carbon-labeled cell clusters were analyzed under phase contrast optics. Their maximal lengths were determined along the major body axis of the parental polyp (oral-aboral) and along the axis of the evaginating bud or tentacle (distal-proximal). The length ratio of individual clusters between  $t_3$  and  $t_0$  was calculated for each individual *Hydra* and plotted as x-fold length. Measurements were done in living *Hydra* relaxed with 2% urethane in hydra medium.

**Inhibitor Treatments.** Treatment with SP600125 (A.G. Scientific) and ZTM000990 (Novartis Pharma AG) started with incubation of experimental animals at a density of 1 polyp per milliliter in inhibitor(s) diluted in 5% DMSO/hydra medium for 30 min on ice. Then, after 3 short washes in 0.1% DMSO/hydra medium, animals were transferred to inhibitor(s) diluted in 0.1% DMSO/hydra medium in the dark. Solutions were replaced daily during long-term treatments. Treatment with 5  $\mu$ M alsterpauellone (A. G. Scientific) in 0.1% DMSO/hydra medium was done in the dark for 24 h. Thereafter, polyps were cultured further in hydra medium. In cotreatment experiments, animals were incubated in 5  $\mu$ M alsterpauellone/25  $\mu$ M SP600125 or 5  $\mu$ M alsterpauellone/25  $\mu$ M ZTM000990 diluted in 0.1% DMSO/hydra medium in the dark for 24 h. Phenotypes of treated polyps were analyzed 60 h after the onset of treatment. Control animals were carried through the experiments with the corresponding treatment schemes using DMSO only.

**Kinase Assays and Phospho-Specific Antibodies.** Polyps treated with SP600125 for 24 h were lysed in NuPAGE LDS sample buffer (Invitrogen) containing 1:100 phosphatase inhibitor (Sigma-Aldrich); c-Jun phosphorylating activity of the lysates was monitored by using a SAPK/JNK assay kit (9810, Cell Signaling Technology). In the same experiment, the supernatant of the immunoprecipitate was used to detect *Hydra* phospho-ERK proteins by using phospho-p44/42 MAP kinase (Thr-202/Tyr-204) antibody (4370, Cell Signaling Technology). Kinase assays were performed according to the manufacturer's guidelines. ATF-2 phosphorylating activity of SP600125-treated tissue lysates was monitored by using a p38 MAP kinase assay kit (9820, Cell Signaling Technology). *Hydra* phospho-JNK levels were determined by using phospho-SAPK/JNK (Thr-183/Tyr-185) antibody (9251, Cell Signaling Technology). Anti-actin antibody (A2066, Sigma-Aldrich) was used to evaluate protein loading in

all experiments. Proteins were separated by SDS/PAGE, blotted, and ECL detected by using standard protocols.

**Immunoprecipitation of Hydra  $\beta$ -Catenin and Tcf.** *Hydra  $\beta$ -catenin* complete cDNA was cloned into a pET15b bacterial expression vector (Novagen) using BamHI restriction sites and expressed in *E. coli* BL21 (DE3) cells. Histidine-tagged  $\beta$ -Catenin was purified by using a Ni-NTA column. *Hydra tcf* complete cDNA was cloned into a pGEX6p3 vector (Amersham) by using BamHI and NotI restriction sites and expressed in *E. coli* BL21 (DE3) cells. Purification of Tcf-GST was performed according to the manufacturer's instructions (Amersham); 1  $\mu$ g of purified recombinant *Hydra  $\beta$ -Catenin* was bound to Ni-NTA agarose in PBS and incubated with an equimolar concentration of *Hydra* Tcf-GST and different concentrations of ZTM000990 for 4 h at 4 °C by shaking. Ni-NTA agarose beads were washed 3 $\times$  with PBS/0.01% Tween20, and bound  $\beta$ -Catenin was released from the Ni-NTA beads by incubation in PBS containing 250 mM imidazole. Samples were analyzed for Tcf-GST by Western blotting with an anti-GST antibody at 1:2,000. In control experiments, Tcf-GST was incubated with Ni-NTA Sepharose without  $\beta$ -Catenin or only GST instead of Tcf-GST was used as a ligand. Also, ZTM000990 did not interfere with the binding of His-tagged *Hydra  $\beta$ -Catenin* to Ni-NTA beads even at concentrations of up to 250  $\mu$ M.

**RT-PCR.** We treated 15 polyps of *H. magnipapillata* strain 105 with 25  $\mu$ M ZTM000990, 5  $\mu$ M alsterpaullone, or cotreated with both inhibitors. Polyps were lysed and total RNA was prepared by using an RNeasy kit (Qiagen), together with on-column DNA digest (DNase set, QIAGEN) according to manufacturer's instruction;  $\approx$ 1  $\mu$ g of total RNA of each sample was reversely transcribed into cDNA by using random primer. Gene expression was examined under the following conditions: 1.5  $\mu$ L cDNA in 30  $\mu$ L reaction scale, 200  $\mu$ M dNTPs, 250  $\mu$ M oligonucleotides, 3 mM MgCl<sub>2</sub>, 0.25  $\mu$ L Taq polymerase (Euroclone). Program: 94 °C 8 min; 94 °C 30 sec (denaturation), 55 °C 30 sec (annealing), 68 °C 40 sec (extension); cycles: 32 (*hytcf*), 32 (*hvwnt5*), 34 (*hvwnt8*), 28 (*Hychdl*), and 24 (*ef1 $\alpha$* ). Primers: *hytcf*, 5'-TTATACCCGGTTGGAGTGC and 5'-TCGAAGCG-CACCAGAAGAGTAACAT; *hvwnt5*, 5'-ATGTTAAC-GAATTTCTTGAGTGCC and 5'-AGAGTTTAAAGATGT-TGGATATCAGCT; *hvwnt8*, 5'-CTCTCCGGCTATT-GTTCAAG and 5'-TTTCAATCGTCTTTACAAACGAAT-GTTTTTC; *Hychdl*, 5'-ACCTGTCCTCCCTGCAATGAA-GAAT and 5'-ACTGCGCAGTTCACATATGT; *ef1 $\alpha$* , 5'-GTTGGTCGTGTTGAAACTGG and 5'-TCCAGCAGCAA-CACCTGCTT. Primer pairs included introns in the corresponding genomic sequences to exclude contamination of the results by nuclear DNA.

1. Vinh Le S, Von Haeseler A (2004) IQPNNI: Moving fast through tree space and stopping in time. *Mol Biol Evol* 21:1565–1571.
2. Momose T, Houliston E (2007) Two oppositely localized Frizzled RNAs as axis determinants in a cnidarian embryo. *PLoS Biol* 5:889–899.
3. Ronquist F, Huelsenbeck JP (2003) MrBayes 3: Bayesian phylogenetic inference under mixed models. *Bioinformatics* 19:1572–1574.
4. Whelan S, Goldman N (2001) A general empirical model of protein evolution derived from multiple protein families using a maximum-likelihood approach. *Mol Biol Evol* 18:691–699.
5. Gelei J von (1925) Über die Sprossbildung bei *Hydra grisea*. *Arch Entwmech Org* 105:633–645.
6. Meinhardt H (1982) *Models of Biological Pattern Formation* (Academic, London).
7. Philipp I, Holstein TW, Hobmayer B (2005) *HvJNK*, a *Hydra* member of the *c-Jun NH2-terminal kinase* gene family, is expressed during nematocyte differentiation. *Gene Expr Patterns* 5:397–402.
8. MacWilliams HK (1983) *Hydra* transplantation phenomena and the mechanism of *Hydra* head regeneration. I. properties of the head inhibition. *Dev Biol* 96:217–238.
9. Rentsch F, Guder C, Vocke D, Hobmayer B, Holstein TW (2007) An ancient chordin-like gene in organizer formation of *Hydra*. *Proc Natl Acad Sci USA* 104:3249–3254.



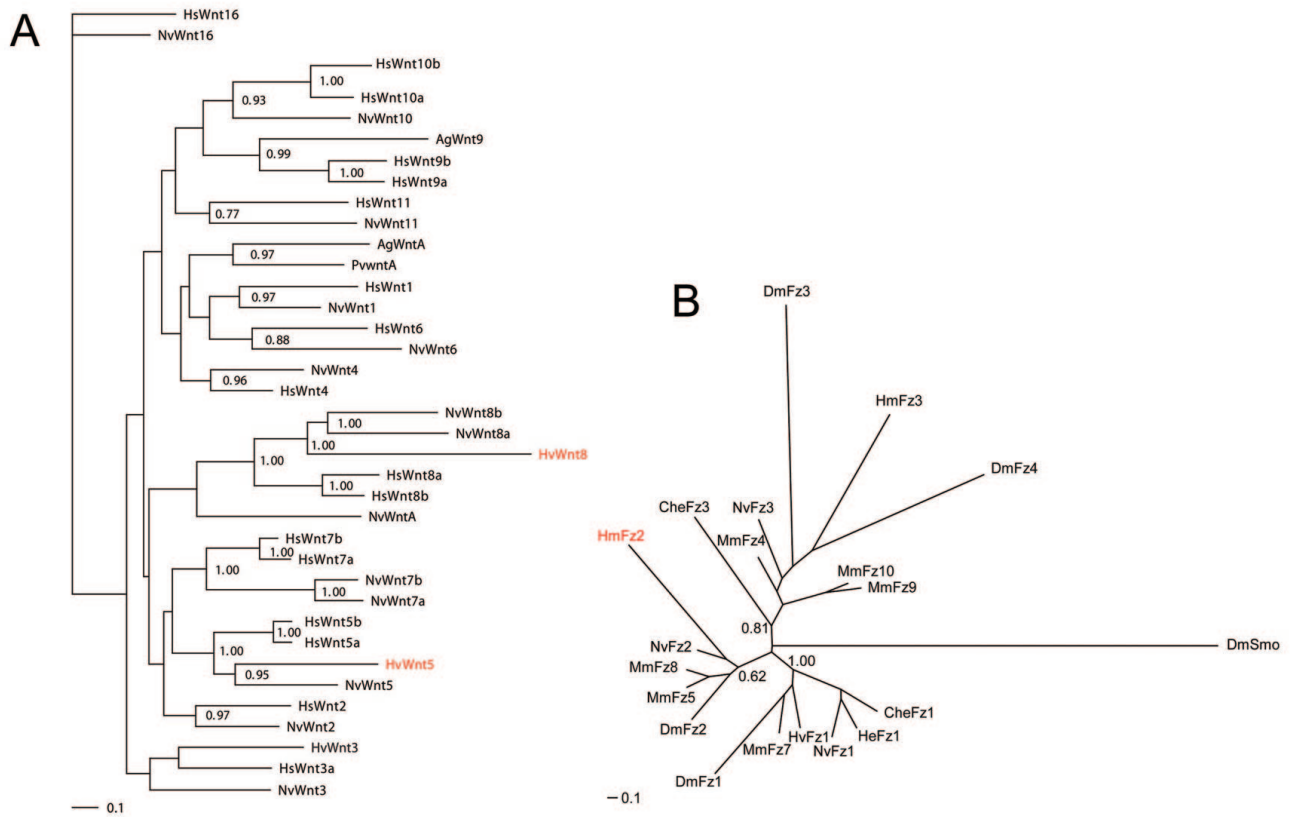

**Fig. S2.** Phylogenetic trees of Wnt and Frizzled subfamilies. (a and b) Maximum likelihood analysis with IQPNNI 2.2 (1) reveals a clustering of the predicted *Hydra* Wnt5 and Wnt8 amino acid sequences within the corresponding Wnt subfamilies supported by high support values from Bayesian analysis (a). A corresponding analysis using full-length Frizzled amino acid sequences places *Hydra* Frizzled2 at the basis of a Frizzled2/5/8 subfamily (b). *Drosophila* Smoothened was used as an outgroup, according to an analysis that had previously defined 3 major Frizzled subfamilies (2). Bayesian analysis was performed by using the MrBayes 3.1.2 program (3). All fixed-rate amino acid models were explored in the MCMC model estimation mode. The fixed-rate amino acid models converged to the WAG model (4) after 1,100 generations; 4 chains were run for 1,000,000 generations; after a burn-in of 250,000 generation every 100th tree was sampled for a 50% majority consensus. Hs, *Homo sapiens*; Nv, *Nematostella vectensis*; Ag, *Anopheles gambiae*; Pv, *Patella vulgata*; Hv, *H. vulgaris*; Hm, *H. magnipapillata*; Che, *Clytia hemisphaerica*; He, *Hydractinia echinata*; Dm, *Drosophila melanogaster*; Mm, *Mus musculus*.





**A**

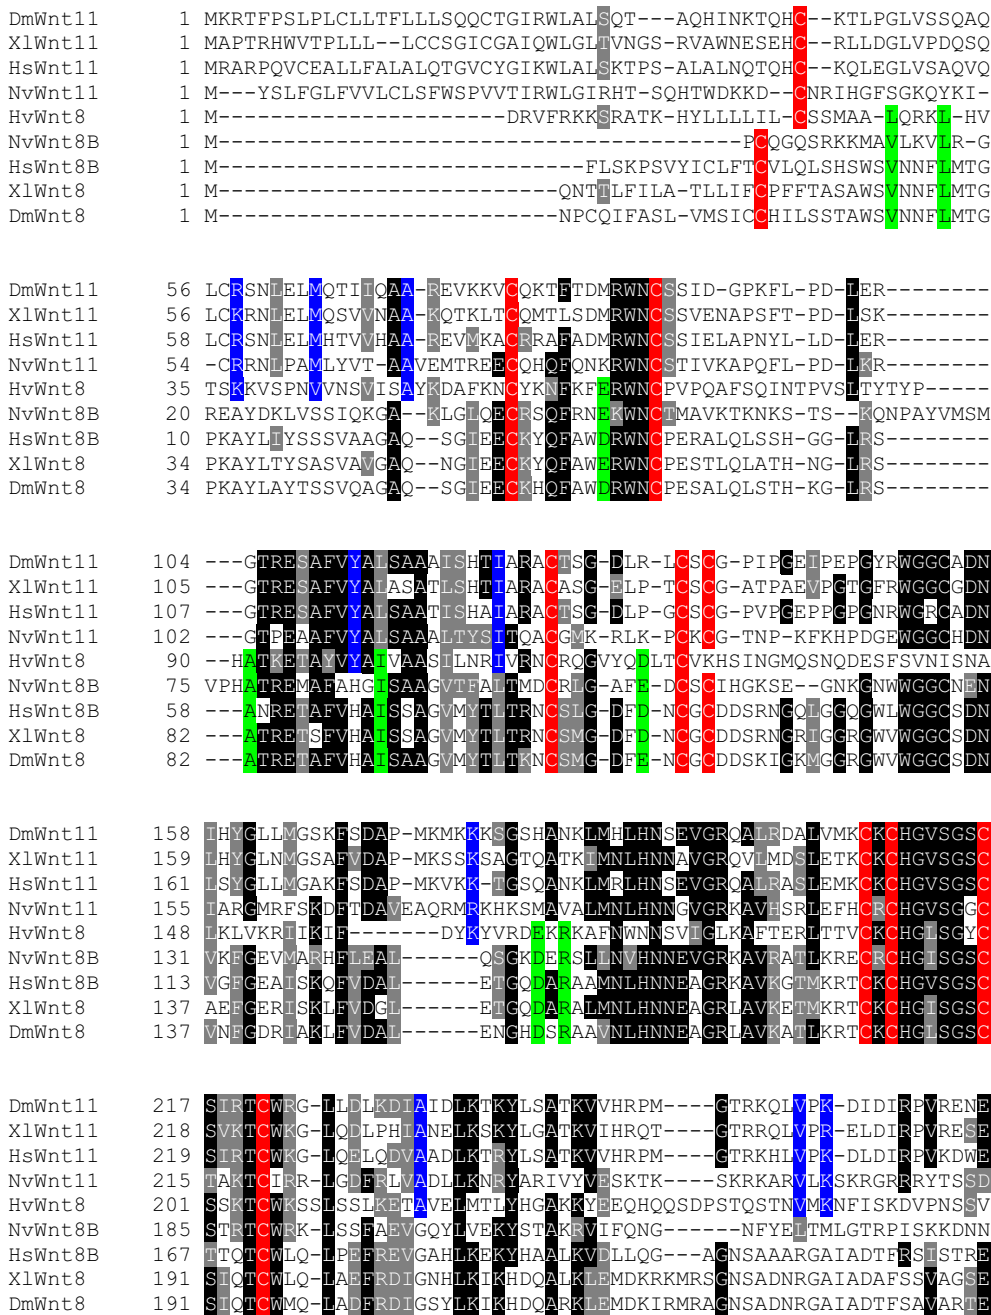

**Fig. S4.** Amino acid alignments of noncanonical Wnt pathway members. (A–E) Amino acid alignments were done using ClustalW ([www.ebi.ac.uk/clustalw/](http://www.ebi.ac.uk/clustalw/)) and visualized using the GeneDoc software ([www.psc.edu/biomed/genedoc/](http://www.psc.edu/biomed/genedoc/)). Conserved residues are shown with black background; semiconservative substitutions are shown in grey. (A) The predicted amino acid sequence of HvWnt8 shows similarity to members of the Wnt11 subfamily. In direct comparison, amino acid residues show identity to or similarity with members of either the Wnt8 (green color) or Wnt11 (blue color) subfamilies. Positions of the conserved cysteine residues are indicated in red. (C) Positions of 10 highly conserved cysteine residues specific for the extracellular Frizzled domain are indicated in red. Accession numbers: HvWnt8, AM279158; NvWnt11, AY687349; NvWnt8, AY792510; DmWnt11, NP.571151; DmWnt8, AAC59697; XlWnt11, AAH84745; XlWnt8, CAA40510; HsWnt11, CAA74159; HsWnt8B, CAA71994; HvWnt5, AM263447; NvWnt5, AX725202; HsWnt5A, NM.003392; HsWnt5B, NM.030775; XlWnt5A, P31286; BfWnt5, AF361014; HmFz2, EU442372; NvFz2, XM.001634945; MmFz5, NM.022721; MmFz8, NM.008058; DmFz2, NM.079431; HvRok, AM263448; HsRok1, BAA75636; HsRok2, O75116; XlRok, AAC06351; DmRok, AAF03776; HvStbm, AM263457; HsStbm1, Q9ULK5; HsStbm2, Q8TAA9; XlStbm, AAK70879; DmStbm, AAC02533; PdStbm, CAJ26300. Species abbreviations: Hv, *Hydra vulgaris*; Hm, *Hydra magnipapillata*; Nv, *Nematostella vectensis*; Pd, *Platynereis dumerilii*; Dm, *Drosophila melanogaster*; Bf, *Branchiostoma floridae*; Dr, *Danio rerio*; Xl, *Xenopus laevis*; Mm, *Mus musculus*; Hs, *Homo sapiens*.

```

DmWnt11 271 LVYLQSSPDYCMKNDKLGSGTQDRCCNKTSS-----GSDSCDLMC--CGRGYNPYTERV
XlWnt11 272 LVYLVSSPDYCTKNPKLGSYGTQDRCCNKTSSV-----GSDSCNLMC--CGRGYNAYTETI
HsWnt11 273 LVYLQSSPDFCMKNEKVGSHGTQDRCCNKTSSN-----GSDSCDLMC--CGRGYNPYTDRV
NvWnt11 270 LVALQGSFNYCHKNRKRGTAGTHGRLCDPTKRR----GEGSCAYLC--CGRGHRTEEVVH
HvWnt8 261 LVYLTESPDYCKKNSIEVQGLNRCNHHLD-----DSCCKLCSGCGYRKHSFVKTI
NvWnt8B 238 FTYSESSPDYQQRNMTVGSAGVLGRECEGSKD-----ELVRCRQLCDSCRFDTQEFTEIK
HsWnt8B 223 LVHLEDSPDYCLENKSLGLLGTGRECLRRGRALGRWELRSCRRLCGDCGLAVEERRAET
XlWnt8 250 LIFLEDSPDYCLKNISLGLQGTGRECLQSGKNLSQWERRSCRRLCTDCGLRVEEKKTEI
DmWnt8 250 LIFMEDSPDYCVKNLSMGLHGTEGRECLQSGKNLSQWERRSCRRLCHECGGLKVEERRIET

```

```

DmWnt11 324 VER-CHKYHWCCYVTCKKCDKTVKYYVCK-----
XlWnt11 325 VER-CCKYHWCCYVMCKKCERTVERYYVCK-----
HsWnt11 326 VER-CHKYHWCCYVTCCRRCERTVERYYVCK-----
NvWnt11 324 EER-CECKYIWCYVVKCQTCRKRVRRESRCL-----
HvWnt8 314 ENMQCNCKFRWCCTVVCEKCVSRQISSRCSLTLR-----
NvWnt8B 293 NTF-CNCKFHWCCKVKCMTCKETTRKTRCVARQQAL-----
HsWnt8B 283 VSS-CNCKFHWCCAVRCEQCRFRVTKYFCRAERPRGGAAHKPGRKP----
XlWnt8 310 ISS-CNCKFHWCCTVKCEQCKQVVIKHFCAARRERDSNMLNTRKKNRGHRR-
DmWnt8 310 VSS-CNCKFHWCCTVKCECTCTQTVTRYFCRAKRHRNRRPHNHSRKRQHTRRG

```

Fig. S4 continued.

# B

```

HvWnt5      1 M-----LTNFI--SGS-----
NvWnt5      1 M-----VLTSEFFHAGHSVWSVNIIP-----
HsWnt5A    1 M-KKSIGILSPGVALGMAGSAMSSKFFLVVAIAFFSFAQVVIIEANSWWSLGMNN---PVO
HsWnt5B    1 M-----PSLLLFTAAALSSWAQLITDANSWWSLALN---PVO
XlWnt5A    1 MRKNLWTFQFGGEASGLVGSAMVVSQHFLVLLMSLYCLTQSVVVESSWWSLGMN---PVO
BfWnt5      1 M-----AVQVSLRVLRLVLTLLSCYTHLGRVRAIWWQMAVDSRRLYSLS

HvWnt5      10 -----VFPDIKICDKRRSLTEKQIKLCLNTNSDHMAYITTEGRIATEECMKQFSDRGWNC
NvWnt5      20 -HQAYIISVQFGLCMNLGGLTREQIDLCQKNIDHMASVGLGAKMAIQECCQFOYQYEKWNCC
HsWnt5A    57 MSEVYIIGAQP-LCSQLAGLSQGGKQKLCFLYQDHMQYIGEGAKTGIKECCQYFRHRRWNC
HsWnt5B    36 RFEMFIIGAQP-VCSQLPGLSPGQRKLCQLYQEHMAYIGEGAKTGIKECCQYFRQRRWNC
XlWnt5A    57 MFEVYIIGAQP-LCSQLSGLSQGGKQKLCQLYQDHMQFIGDGAKTGIKECCQYFRHRRWNC
BfWnt5      44 RAELYIIGAQP-LCTITLAGLSSGQRKLCNLYQDHMSSVGI GARQGI EECCHQFRDRRWNC

HvWnt5      64 TFPEPNIIIP--FLHPYMPIGTRETAFVHSITAAATMHSISRACMENKLSHHCSCSQEKKP
NvWnt5      79 SIPDAEKSSLFERITSKDVATREAAALTYAISAGVVAALARACTEGNLSTCGCSRERRP
HsWnt5A    116 STVDNNTS----VFGRVMQIGSRETAFTYAISAAGVVNAMSACREGELESTCGCSRAARP
HsWnt5B    95 STADNAS----VFGRVMQIGSRETAFTHAISAAGVVNAISRACREGELESTCGCSRTARP
XlWnt5A    116 STVDNNTS----VFGRVMQIGSRETAFTYAISAAGVVNAISRACREGELESTCGCSRAARP
BfWnt5      103 TTSDEDS----VFGRIVNIGSREASFTYAISAAGVVNAISRACREGELESTCGCSRAARP

HvWnt5      122 ENLPKTDMMWNGCGDNLPYGYQFSKEFVDSKE--TILKDSAENFGRVLMNLHNEAGRVAV
NvWnt5      138 LDLNKEYQWGGCGDNIEYAVKFGREFMEAGE DHRPTEEDRKKYARTLMNLHNNLGRVVV
HsWnt5A    171 KDLPRDWLWGGCGDNIDYGYRFAKEFVDARERERIHAKGSME SARILMNLHNEAGRRTV
HsWnt5B    150 KDLPRDWLWGGCGDNVEYGYRFAKEFVDAREREKNFAKGS EEOGRVLMNLQNEAGRRAV
XlWnt5A    171 KDLPRDWLWGGCGDNLDYGYRFAKEFVDAREREKIHQKGSYESSRIMMNLHNEAGRRAV
BfWnt5      158 KDLNRDWLWGGCGDDVEYGYVFAREFVDAQEKQIIPTPGSOAHARQLMNMHNEAGRKLT

HvWnt5      180 FEKSKIQCRCCHGVSKNCAKTKCYRQLSEFFKDVGYQLEQLHQSAIHVOLSQSGQKN---DT
NvWnt5      198 KDISVVECKCHGVCGSCNLKTCWRQLVEFREIGNALHDKYDAAVQVALKRREGRSLLLP
HsWnt5A    231 YNLADVACKCHGVSGSCSLKTCWLQQLADFRKVGDLKEKYDSAAAMRLNSRGK-----
HsWnt5B    210 YKMAADVACKCHGVSGSCSLKTCWLQQLAEFRKVGDRLEKEKYDSAAAMRVTRGR-----
XlWnt5A    231 STLADVACKCHGVSGSCSLKTCWLQQLADFRKVGDLHLEKEKYDSAGAMKLNTRGK-----
BfWnt5      218 HSNAADVACKCHGVSGSCSLKTCWQLADFRTVGNLLKDKYDGANEVKLIKRGKR-----

HvWnt5      237 EITKLVQFNSNIDIYTSKDMIYIDDSFSSYCNQLSIGSFTEGREGICIKDDNSKECGRLC
NvWnt5      258 RSRHYSQRKAKSAQETRDLDLVYIDKSPDFCSKNAAHGAQGTGRGRKCIKESLQKDGCNLIC
HsWnt5A    284 ----LVQVNSRFNSPTTQDLVYIDSPDYCVRNESGSLGTQGRLCNKTSSEMGDGCCELMC
HsWnt5B    263 ----LELVNSRFTQPTPELDVYIDSPDYCLRNESGSLGTQGRLCNKTSSEMGDGCCELMC
XlWnt5A    284 ----LVQVNNKFNFSPTMNDLVYIDSPDYCVHNESTGSLGTQGRLCNKTSSEMGDGCCELMC
BfWnt5      272 --YRLDRRNPRFNVFTDELDLVYLNKSPDYCNADPTIGSLGTHGRECNKTGLCTDGCNLMC

HvWnt5      297 CEKGHYTKVFTTENCAKFLWCCFVCKQSCCKKQONKHVCK
NvWnt5      318 CSRGYKMKKEVQATRCRCFKHWCCVKCKTCKIKNVTTHTCN
HsWnt5A    340 CGRGYDQFKIVQTERCHCKFWCCYVKCKKCTEIVDQFVCK
HsWnt5B    319 CGRGYNQFKSVQVERCHCKFWCCFVRCCKKCTEIVDQYICK
XlWnt5A    340 CGRGYDQFKIVQTERCHCKFWCCYVKCKKCTEIVDQFACK
BfWnt5      330 CGRGYNTFKREKVERCNCKFWCCYVKCKRCSLKNVYVCK

```

Fig. S4 continued.



C

HmFz2 1 MRRNLYLHILKSVI IHLLENLIFCEPR-----GIRERY  
 NvFz2 1 MAT-RRIDRVFVAVAFTISCLN-----YVLTK-  
 MmFz5 1 MAR-PDPSAPPSTL--LILLLAQLVCG-----RAAAS  
 MmFz8 1 MEW-GYTLLEVTSLLAALAVLQRSSG-----AAAASA  
 DmFz2 1 MRH-NRLKVLILGLVLLITSCRADGPLHSADHGMGGMGGHGLDASPAPGYGVVIPKID

HmFz2 44 ETRKCEKLSITMCEKVGYNLTMPNKHGHVNOIDAGQLRQFAPLVAINCSPLLAHFVCS  
 NvFz2 79 -EMKCEEITIPMCRGIGYNLTMPNMFNHDQAEAALEVHQFWPLVEIQCSPLRFFLCS  
 MmFz5 48 KAPVQCEITVPMCRGIGYNLTMPNQFNHDQDEAGLEVHQFWPLVEIHCSPDLRFFLCS  
 MmFz8 50 KELACQCEITVPLCKGIGYNYTMPNQFNHDQDEAGLEVHQFWPLVEIQCSPLRFFLCS  
 DmFz2 54 PNLKCEEITIPMCRGIGYNTSFPNEMNHEQDEAGLEVHQFWPLVEIKCSPLRFFLCS

HmFz2 95 IYAPMCDPVYKDIIVPCQSLCENIRNSCEKFMKQNGMTWPDNLQCSQFPTR--KDPICM  
 NvFz2 85 MYAPLCEKHVDKDLPPCRSVCERARTGCAPLMRKYGFSPERMKCNFPELGDENTLCM  
 MmFz5 89 MYTPICLPDYHKPLPPCRSVCERAKAGCSPLMROYGFAPPERMSCDRLPVLGGDAIVLCM  
 MmFz8 91 MYTPICLEDYHKPLPPCRSVCERAKAGCAPLMROYGFAPDRMRCDRLPEQG-NPDTLCM  
 DmFz2 120 MYTPICLEDYHKPLPPCRSVCERARSGCAPTMOQYSFEWPERMACDHLPLHG-DPDTLCM

HmFz2 153 KPFDFFPEPSIE-----THLNLP  
 NvFz2 144 GR-----NSSGESTPK  
 MmFz5 149 DYNRSEATTASPKSFPKPTLPGPPG-----A  
 MmFz8 150 DYNRTDLTTAAP-SPPRRLPPPPPPGEPQPPSGSGHSRPPGARPPHRGGSSRSGDAAAAP  
 DmFz2 179 EQPSYTEAGSGGSSGGSGGSGSGSGSGGKRKQGGSG-----SGGSGAGGSSGSTSTK

HmFz2 171 DENKKTSLIQTKDVKIRDFSGGCLCKYPFVSVNSS-----  
 NvFz2 155 PSQSQPQ----AASPDTAAISANCCSCRPPFVSIAGKNIKPTR-----  
 MmFz5 176 PSSGGEC-----PSGGPS---VCTCREPFVPIPKESHPLYN-----  
 MmFz8 209 PSRGGKAR----PPGGGAAPCEPGCCCRAPMVSVSSERHPLYN-----  
 DmFz2 231 PCRGRNSKNCQNPQGEKASGKECSCSRSEPLIFLGKEQLLQQQSQMPMMHPPHHWYMNLT

HmFz2 208 -SNIDLEPPCVLPCGQYFFSNTQNI FMKFWLSLWSLISLITTAVTLLTFLIDRTKFKFVE  
 NvFz2 194 AISVGGVPQCAMACNRTYFTHQDSFASFWIGLWAILCFISTLVTLTFLVDMHRFKYPE  
 MmFz5 209 KVRTGQVPNCAVPCYQPSFSPDERTFATFWIGLWSVLCFISTSTVATFLIDMERFRYPE  
 MmFz8 248 RVKTGQIANCALPCHNPFPSQDERAFTVFWIGLWSVLCFVSTFATVSTFLIDMERFRYPE  
 DmFz2 291 VQRTAGVPNCGIIPCKGPPFSNDEKDFAGLWIALWSGLCECSTLMTLTTFTIIDTERFKYPE

HmFz2 267 QPIILLSFCYFIVSEGYIIRLIVYGFKA IACNDHT-----  
 NvFz2 254 RPIIFLSGCYLMVSVGYIIRLIVAGHKQIACDSN-----  
 MmFz5 269 RPIIFLSACYLCVSLGFLVRLVGHASVACS-----REHS-  
 MmFz8 308 RPIIFLSACYLIVSVGYLVRVAGHEKVAACSGGAPGAGGRGGAGAAAAGAGAAGRASS  
 DmFz2 351 RPIIFLSACYFIVAVGYLSRNFQLNEETACDG-----

HmFz2 301 -----GFLHYASTGPASCTAVFILTIFYFTNVSWIWWVWLSINWFLSSGLKW  
 NvFz2 287 -----GLMRYDTSGPASCTLVFLLVYFFGMASVWVWVILAFWFLSAGMKW  
 MmFz5 304 -----HIHYETGPALCTVVFLLVYFFGMASIIWWVILSLTWFLAAGMKW  
 MmFz8 368 PGARGEYEELGAVEQHVRVYETTGPAALCTVVFLLVYFFGMASIIWWVILSLTWFLAAGMKW  
 DmFz2 383 -----LLRESSTGPHSCTLVFLLTYFFGMASIIWWVILSFTWFLAAGLKW

HmFz2 347 TNGTISSSYQYFHFVAWLIPITICTMAILAMSAIDGDPVSGICTVGNHDSNTLTI FVIGPI  
 NvFz2 333 SSEATINYSQYFHAVAWLVPAICAI AVLAMSTIDGDPVSGICYVGNENLQSLVVFVIVPL  
 MmFz5 349 GNEATAGYAQYFHLAAWLIPSVKSITALLSSVDGDPVAGICYVGNQNLNSLRGFVLGPI  
 MmFz8 428 GNEATAGYSQYFHLAAWLIPSVKSI AVLALLSSVDGDPVAGICYVGNQSLDNLRCGFVLAPL  
 DmFz2 429 GNEATIKHSQYFHLAAWLIPVQSVAVLILLSAVDGDPI LGICYVGNLNPDLKRTFVLAPL

Fig. S4 continued.

HmFz2 407 LIYTMISLSFFTAGVVAKLRIEQTRNEA-----KNNLKSGRELSRVGMFTLLFVPAVS  
 NvFz2 393 VVYLVFGTSFLMAGFYSLVRIKLLRQHG----STKTDKLEKLMIRIGVFSVLYTVPATI  
 MmFz5 409 VLYLLVGTLLFLLAGFVSLFRIRSVIKQGG----TKTDKLEKLMIRIGIFTLLYTVPASI  
 MmFz8 488 VIYLFIGTMFLLAGFVSLFRIRSVIKQGG---PTKTHKLEKLMIRLGLFTVLYTVPAAV  
 DmFz2 489 FVYLVIGTIFLMAGFVSLFRIRSVIKQGGVVGAGVKAADKLEKLMIRIGIFSPLYTVPATI

HmFz2 462 LIIGCYFYEHSYKEIWEKSTNDCMP-----IKKQPIHYTFIFKYLMSLVIGTATGIGTLN  
 NvFz2 449 VVACYYYELVNRETWERTINCSGCG--VTR--VKPDHSVFIKIFYMALVVGITSGFWIWS  
 MmFz5 464 VVACYLYEQHYRESWEAALTCACPGPDAGQPRAKPEYVWVLMMLKYFMCLVVGITSGVWIWS  
 MmFz8 545 VVACLFYEQHNRPWEATHNCPCLRDLQPDQARRPDYAVFMLKYFMCLVVGITSGVWVWS  
 DmFz2 549 VIIGCYLYEAAAFEDWIKALACPCAQ--VKGPGKKPLYSVLMMLKYFMALAVGITSGVWIWS

HmFz2 517 SDALGAWRRFFKRHCKITK-----SLAQ  
 NvFz2 505 GKTIESWRNFCARLSGTQN-----TRRAIPPK  
 MmFz5 524 GKTLESWRREFTSRCCSSR---RGHKSGGAMA-----ACD-----YA  
 MmFz8 605 GKTLESWRALCTRCCWASKGAAVGAGAGGSGP-----CGSGPGPGGGGGHGGGGGSIYS  
 DmFz2 607 GKTLESWRREFWRLLGAPDRGTGANQALIKQRPPIPHPYAGSGMGMPVGSAAAGSLLATFYT

HmFz2 540 EKNGQLIPNNSKKGVAI-----  
 NvFz2 532 KANTATV-----  
 MmFz5 558 EASAALTGRITGPPGPTAAYHKQVSLSHV  
 MmFz8 659 DVSTGLTWRSG-TASSVSYKQMPLSQV  
 DmFz2 667 QAGGASVASISHHHLHHHVLIKQPAASHV

Fig. S4 continued.

# D

HvRok 1 M-----TEVEKRYQSLAEKLLKPTNEIYVEGLLDTVTSLSLYEQTSS  
HsRok1 1 MSRPPTGKMPGAPETAFPGDGAGASRQRKLEALIRDPRSPINVESLLDGLNSLVLDLDFP  
HsRok2 1 MSRPPTGKMPGAPETAFPGDGAGASRQRKLEALIRDPRSPINVESLLDGLNSLVLDLDFP  
XlRok 1 M-----SPRQDEYMGTRWOTLEALIRDPRSPINVEGLLDTVTSLSLYEQTSS  
DmRok 1 M-----PAGRETVTKQRSMVVERRRRANTLEREMRDPTSICNVDCLLDTVSALVSDCDHE

HvRok 42 HLRNEKNEFENFMKRYAAAAEITKSRINIKDFNEIKVLGGAFGEVKLMRHKDIKQLYAM  
HsRok1 61 ALRKNKNIDNFLNRYEKIVKIKGLQMKAEYDVVKVIGRGAFFGEVQLVRHKASQKVYAM  
HsRok2 61 ALRKNKNIDNFLNRYEKIVKIKIRGLQMKAEYDVVKVIGRGAFFGEVQLVRHKASQKVYAM  
XlRok 47 ALRKNKNIDNFLNRYEKIVREVRKGLQMKAEYDVVKVIGRGAFFGEVQLVRHKSSQKVYAM  
DmRok 56 SLRRLKNIQYAAKYKPIAMQINQLRMNVEDHFHFKLIGAGAFGEVQLVRHKSSQKVYAM

HvRok 102 KLLSKFEMIKKSEVAFWEERDIMAHANSEWIMATHYAFQDDKYLYMAMDYMPGGDFVSL  
HsRok1 121 KLLSKFEMIKRSDSAFFWEERDIMAFANS PWVQLFYAFQDDRYLYMVMYMPGGDLVNL  
HsRok2 121 KLLSKFEMIKRSDSAFFWEERDIMAFANS PWVQLFYAFQDDRYLYMVMYMPGGDLVNL  
XlRok 107 KLLSKFEMIKRSDSAFFWEERDIMAFANS PWVQLFCFQDDRYLYMVMYMPGGDLVNL  
DmRok 116 KRLSKFEMMKRPSAFFWEERHIMAHANSEWIVQLHFAFQDAKYLYMVMDFMPGGDIVSL

HvRok 162 LSNYDIPEDWAAFYIAELVLAIDALHKYGVVHRDIKPDNMLLDKNGHLKLAADFQTCIRMD  
HsRok1 181 MSNYDVPEKWAKFYTAEVVLAIDAIHSMGLIHRDVKPDNMLLDKNGHLKLAADFQTCMKMD  
HsRok2 181 MSNYDVPEKWAKFYTAEVVLAIDAIHSMGLIHRDVKPDNMLLDKNGHLKLAADFQTCMKMD  
XlRok 167 MSNYDVPEKWAKFYTAEVVLAIDAIHSMGLIHRDVKPDNMLLDKNGHLKLAADFQTCMKMD  
DmRok 176 MGDYDIPKWAIFYTMVVLALDTIHNMGFVHRDVKPDNMLLDKNGHLKLAADFQTCMRMG

HvRok 222 KDGIVHSDTAVGTTDYISPEVLLTERHGHGVYGRECDYWAAGVVLVEYLVLVGDPPFLDQSY  
HsRok1 241 ETGMVHCDTAVGTPDYISPEVLKSO-GGDGEYGRECDWWSVGVFLYEMLVGDTPFYADSL  
HsRok2 241 ETGMVHCDTAVGTPDYISPEVLKSO-GGDGEYGRECDWWSVGVFLYEMLVGDTPFYADSL  
XlRok 227 QTGMVRCDTAVGTPDYISPEVLKSO-GGDGEYGRECDWWSVGVFLYEMLVGDTPFYADSL  
DmRok 236 ANGVVSSNAVGTGTPDYISPEVLKSO-GVDNEYGRECDWWSVGVFLYEMLVGETPFYADSL

HvRok 282 SGTYEKILNHKNSLOFFTDEIKSDCKVICGFLTTREHRLGRNGIDEIKSYKFFQREDW  
HsRok1 300 VGTYSKIMDHKNSLCFPEDAIEISKHAKNLICAFITDREVRLGRNGVEEIRQHPFFKNDQW  
HsRok2 300 VGTYSKIMDHKNSLCFPEDAIEISKHAKNLICAFITDREVRLGRNGVEEIRQHPFFKNDQW  
XlRok 286 VGTYSKIMDHKNSLNFPEDEISAHAKNLICAFITDREVRLGRNGIEDIKQHPFFKNDQW  
DmRok 295 VGTYSKIMDHKNSLNFPEVEISEQAKALIRAFITDRTORLGRYGIEDIKAHPFFRNDTW

HvRok 342 NWDNIRSNVAKFTPLDSDIDTRNFDDFSLEKKNITDTELSKVFETGNHLPFIGFTYYSKH  
HsRok1 360 HWDNIRETAAPVVPPELSSDIDSSNFDDIEDD-KGDVETFPKPAFVGNQLPFIFGFTYYRE  
HsRok2 360 HWDNIRETAAPVVPPELSSDIDSSNFDDIEDD-KGDVETFPKPAFVGNQLPFIFGFTYYRE  
XlRok 346 NWDNIRETVAPVPELSDIDTSSNFDDIEDD-KGDAETFPKPAFAGNQLPFIFGFTYYRE  
DmRok 355 SFDNIRESVPPVPELSSDDTRNFEDIERD-EKPEEVFPKPCFDGNHLPFIGFTYTGDD

HvRok 402 NRIIGNQGTSEENNSK-----VQSLTKIREVENQLKNEKNAKDESEKVLKNIKNK  
HsRok1 419 NLLLSDSPSCRENDSISRKNE--ESQETQKKLYTLEEHLNEMOAKEELEQKCKSVNTR  
HsRok2 419 NLLLSDSPSCRENDSISRKNE--ESQETQKKLYTLEEHLNEMOAKEELEQKCKSVNTR  
XlRok 405 NLLLSSESSQNCKEKKILCPTNERAVSTSCKKSINKLEEQLHNEMQTKDELEQKFRVNLIR  
DmRok 414 YQLLSSDTVDAESKEANVANS GAASNHGHGHNHRHRPSNSNELKRLEALLEREFRSEA

Fig. S4 continued.

HvRok 454 TQKLTSDWEAEVELRKNGEIKTR----DLERAAALYKHDIKETQRKLDVETDTKKKFEAK  
 HsRok1 477 LEKTAKLEEEIILRKSVESALR----OLEREKALLOHKNAEYORKADHEADKKNRLEND  
 HsRok2 477 LEKTAKLEEEIILRKSVESALR----OLEREKALLOHKNAEYORKADHEADKKNRLEND  
 XlRok 465 LEKIVKELDEEASSRKNIESTTR----OLEREKALLOHKNTEYORKAENDADKRRSLENE  
 DmRok 474 LEQQDAGLRQQIETLITKREAEQLRIASEYEKDLALRQHNYKVAMQKVEQETELRRKTEAL

HvRok 510 FOELQAKLDSESSTKEDSNKLOKLIIAERENNDLKEKLRLETFGNIKWKKIENDYRKAQ  
 HsRok1 533 VNSLKDQLEDLKKRNQNSQISTEKNVQLQRQLEDTNALLRTESDTAARLRKTQAESSKQI  
 HsRok2 533 VNSLKDQLEDLKKRNQNSQISTEKNVQLQRQLEDTNALLRTESDTAARLRKTQAESSKQI  
 XlRok 521 VNSLKDQLEDMKRRNONSQISNEKNVQLQRQLEDANAQLRTESDAARLRKTQTEMKQI  
 DmRok 534 LVETQRNLENEQKTRARDLNIINDKVVVLEKQLEMEQSYKTEENTQKLLKHNAELDFTV

HvRok 570 AVADHAFKELFEKNQGLGIKTDTEKELMKVQALQAETTALKQANDQCRDEKQNALLK  
 HsRok1 593 QQLESNNRDLQDKNCLEETAKLKEKEFINLQSALESERRDRTHGSEIINDLQGRICGLE  
 HsRok2 593 QQLESNNRDLQDKNCLEETAKLKEKEFINLQSALESERRDRTHGSEIINDLQGRICGLE  
 XlRok 581 QQLENNREFQDKTCMLNNAKLEKDFINLQSALESERRDRTOGSEVISDLQGRISVLE  
 DmRok 594 KSQEFKVRDMVDMIDLQKHKEELGQENAELOALVQEKNLRSQLEKEMHKEAENKMQTLI

HvRok 630 DEVDOLFTRYKSDANAMQKLODEITVEKSKASTLFEELKQKAKYEMEKTNTAKQIRKLS  
 HsRok1 653 EDLKNKILLAKVELEKRQLOERFDLEKEKSNMEIDMTYQLKVIQOOSLEQEE-----A  
 HsRok2 653 EDLKNKILLAKVELEKRQLOERFDLEKEKSNMEIDMTYQLKVIQOOSLEQEE-----A  
 XlRok 641 EDLKKGKELLARADAEKQQLHERLAILEKEKSNMEIDMTYKLLKALQOSVEKEE-----S  
 DmRok 654 NDIERTMCREQKAQEDNRALLEKISDLEKAHAGLDFELKAAQGRYQQEVKAHQ-----E

HvRok 690 TE-----KKEKKLSEIQILEKESADLQKEREERTIRIESKAANLEFLMNDLI  
 HsRok1 707 --EHKATKARLADKNKIYESIEEAKSEAMKEMEKKLLEERTLKQKVENLLLEAEKRCSIL  
 HsRok2 707 --EHKATKARLADKNKIYESIEEAKSEAMKEMEKKLLEERTLKQKVENLLLEAEKRCSIL  
 XlRok 695 --EHKATKARLADKNKIYQSIEETKSEAMKDMEKKLQEEERVAKORLENNLLETEKQYSML  
 DmRok 708 --TEKS-----RLVSRREANLQEVKALQSKLNEEKSARITKADQHSQEKERQLSML

HvRok 735 QLDLKNIKQKNVRLSEYYQASONKIDSLNSLIQBEIVKRSDIQNEFINAVMSDITQKTKKE  
 HsRok1 765 DCDLKQSQOKINELLKQKDVLNEDVNRNLTKIEQETQKRCLTQNDLKMOTQVNTLKMSE  
 HsRok2 765 DCDLKQSQOKINELLKQKDVLNEDVNRNLTKIEQETQKRCLTQNDLKMOTQVNTLKMSE  
 XlRok 753 DCDLKQAKQKINELBALKDKLSEDKNLTAKAEQETQKRSLSONDLKMQLQVNVCLKMSE  
 DmRok 756 SVDYRQIQLRLOKLEGECEQSEKVAALQSQLDQEHSKRNALLSELSIHSSEVAHLRSRE

HvRok 795 QQLKSDCNRIILDERKQLQEAYNKLSASAADDIQMKELQDQLEAEQYFSTLYKTQVRELK  
 HsRok1 825 KQLKQENNHLMEMKMNLEKQNAELRKERQDADGQMKELQDQLEAEQYFSTLYKTQVRELK  
 HsRok2 825 KQLKQENNHLMEMKMNLEKQNAELRKERQDADGQMKELQDQLEAEQYFSTLYKTQVRELK  
 XlRok 813 KQLKQEVNHIETIKLNLEKQNNELRKERVDADGQMKELQDQLEAEQYFSTLYKTQVRELK  
 DmRok 816 NQLQRELSSTQREAKRRFEEDLTQLRSTHHEALANNRELQAQLEAEQCFSRLYKTQANENR

HvRok 855 EEVDEEKKEVQCLQSDIQMVTEERDSISAQLELALAKAESEELARLSIAEEQIYDLEKEKT  
 HsRok1 885 EECEEKTKLKQELQOKQOELQDERDSLAAQLEITLTKADSEQLARLSIAEEQYSDLEKEKI  
 HsRok2 885 EECEEKTKLKQELQOKQOELQDERDSLAAQLEITLTKADSEQLARLSIAEEQYSDLEKEKI  
 XlRok 873 EECEVKGMYKEVQOKVQELQDERDSLAAQLEITLTKADSEQLARLSIAEEQYSDLEKEKI  
 DmRok 876 EESAER-----LSKIEDLEERVSLKHQVQAVARADSEALARLSIAEETVAADLEKEKT

HvRok 915 MLELEVKDLLAKNKADSFKEFKKQEADEKIRVLETELQNEVRKRIESIEQIKTDIVEKK  
 HsRok1 945 MKELEIKEMMARHKQELTEKDATIASLEETNRTLTSVDVANLANEKEELNNKLDVQEQLS  
 HsRok2 945 MKELEIKEMMARHKQELTEKDATIASLEETNRTLTSVDVANLANEKEELNNKLDVQEQLS  
 XlRok 933 MKELEIKEMMARHKQELAKEYATITSLEETNRTLTDVGNLANEKEDLNNRLKKAHEQIQ  
 DmRok 929 IKELEIKDFVMKHRNETNAKEAALATLKEAENELHKKLGOKAAEYEDLVQHQHKKQOEELA

Fig. S4 continued.

|        |      |                                                                |
|--------|------|----------------------------------------------------------------|
| HvRok  | 975  | -----QNEEIEALKKAVKQEQTLLKIQAVNKLAEKMSERKEISSKGGKNKVTSAELKK     |
| HsRok1 | 1005 | RLKDEEISAAAIKAQFEKOLLTERTLKTQAVNKLAEIMNR-----KEPVKRGNDTDVRR    |
| HsRok2 | 1005 | RLKDEEISAAAIKAQFEKOLLTERTLKTQAVNKLAEIMNR-----KEPVKRGNDTDVRR    |
| XlRok  | 993  | RLKEEENSVVTIKIQFEKOLLTERTLKTQAVNKLAEIMNR-----KLPTKRGPDTDVRR    |
| DmRok  | 989  | LMRS--SKDEEITKLLDKCKNEVLLKQVAVNKLAEVMNRRSDLPKQKNKARSTAEIRK     |
|        |      |                                                                |
| HvRok  | 1027 | KEKENRKLQLLLEQEKNKYQITFTKHQGNSELNKEIEKQKEALTKVMELESKGMVIEQ     |
| HsRok1 | 1059 | KEKENRKLHMLKSEREKLTQOMIKYQKELNEMQAQIAEESQIRIELQMTLDSKSDIEQ     |
| HsRok2 | 1059 | KEKENRKLHMLKSEREKLTQOMIKYQKELNEMQAQIAEESQIRIELQMTLDSKSDIEQ     |
| XlRok  | 1047 | KEKENRKLQDLKSEREKETQLVIKYQREMNDMQAQIADENQVRIELQMALDSKSDIEQ     |
| DmRok  | 1046 | KEKEMRRLQCELSQERDKFNQLLLKHQ----DLQQLCAEEQQLKQKVMVEIDCKATPIEN   |
|        |      |                                                                |
| HvRok  | 1087 | LQEDNKNLNTETENLRALVPVGTNSSILHPANMKLEGWLSIP-ERRVKKNMLWKKQYVVV   |
| HsRok1 | 1119 | LRSQLQALHIGLDSSTIGSGPGDAEADDGFPESRLEGWLSLP-VRNNTKKFGWVKKYVIV   |
| HsRok2 | 1119 | LRSQLQALHIGLDSSTIGSGPGDAEADDGFPESRLEGWLSLP-VRNNTKKFGWVKKYVIV   |
| XlRok  | 1107 | LR----SQMLGLDSTISIGSGHGD TDAEDGFPESRLEGWLSLP-LRN-AKKFGWVKKYVVV |
| DmRok  | 1102 | LQSKLNETASLSSADNDPEDSQHSSLLSLTQDSVFEGLWLSVFNKQNRRRGHGWKRQYVIV  |
|        |      |                                                                |
| HvRok  | 1146 | SQOKIEFFFTNEQDKA-PNTPAMILDIGKLFHVRSVTQGDVIRVDVKDIPKIFQILYANEG  |
| HsRok1 | 1178 | SSKKILFYDSEQDKE-QSNPYMVLIDDKLFHVRPVTQTDVYRADAKEIPRIFQILYANEG   |
| HsRok2 | 1178 | SSKKILFYDSEQDKE-QSNPYMVLIDDKLFHVRPVTQTDVYRADAKEIPRIFQILYANEG   |
| XlRok  | 1161 | SSRKILFYDSEQDKE-LSNPSMVLIDDKLFHVRPVTQTDVYRADAKEIPRIFQILYANEG   |
| DmRok  | 1162 | SSRKIFFYNSDIDKHNTIDAVLILDLSKVYHVRSVTQGDVIRADAKEIPRIFQILYAGEG   |
|        |      |                                                                |
| HvRok  | 1205 | ESKNPEEKTE-----QDQLEQDKAAVVI PFKDHQFVVMHYHMPNACDMCQROMWHMFKPP  |
| HsRok1 | 1237 | ESKKEQE-----EPVEPVGEKSNYICHKGHEFIPTLYHFPTNCEACMKPLWHMFKPP      |
| HsRok2 | 1237 | ESKKEQE-----EPVEPVGEKSNYICHKGHEFIPTLYHFPTNCEACMKPLWHMFKPP      |
| XlRok  | 1220 | ESKKEQE-----EQVDPLE-KSNYICHKGHEFIPTLYHFPTS CDACMKPLWHMFKPP     |
| DmRok  | 1222 | ASHRPDEQNQLDVSVLHGNCNEERPGTIVHKGHEFVHITYHMPTACEVCPKPLWHMFKPP   |
|        |      |                                                                |
| HvRok  | 1260 | IAVECRRRCVKCHKDHVDEEDVVIQPCKVTVDLATAKDLLILANDVDEQNGYKNYIKKL    |
| HsRok1 | 1289 | PALECRRCHIKCHKDHMDKKEEIIAPCKVYYDISTAKNLLLLANSTEEQKQWVSRLVKKI   |
| HsRok2 | 1289 | PALECRRCHIKCHKDHMDKKEEIIAPCKVYYDISTAKNLLLLANSTEEQKQWVSRLVKKI   |
| XlRok  | 1271 | AALECRRCHIKCHKDHMDKKEEIIAPCKVNYDISTAKNLLLLANSTEEQKQWVSRLVKKI   |
| DmRok  | 1282 | AAYECKRCRNKTHKEHVDK-HDPLAPCKLNHDPRESARDMLLLAATPEDQSLVVARLLKRI  |
|        |      |                                                                |
| HvRok  | 1320 | FAKVLEP-----                                                   |
| HsRok1 | 1349 | PKKPPAPDPFARSSPRTSMKIQQNQSIRRPQRQLAPNKPS-----                  |
| HsRok2 | 1349 | PKKPPAPDPFARSSPRTSMKIQQNQSIRRPQRQLAPNKPS-----                  |
| XlRok  | 1331 | PKKPPASEHQARSSPRPPAKASINQSMRRPQRQLAPNKPS-----                  |
| DmRok  | 1341 | QKSGYKAASVNNNS-TDGSKISPSQSTRSSYPYAVNVQRSATLPANSSLK             |

Fig. S4 continued.



## E

HvStbm 1 M-----ADLDGVI~~EVQVIQ~~-----  
 HsStbm1 1 MDTESQYSGYSYKSGHRSR~~SRK~~--HRDRDRHRSK~~SRDGGRG~~DKSVTIQAPG-EPLLDNE  
 HsStbm2 1 MDTESTYSGYSYSSHSK~~SHRQGERTRERHKS~~PRNKDGRGSEKSVTIQPPPTGEPLLCND  
 XlStbm 1 MDNDSQYSGYSYKSGQSR~~SRK~~--HRDRRERHRSK~~SREGSRG~~DKSVTIQAPG-EPLLDNE  
 DmStbm 1 MENESVKS~~EHSGRSRRSR~~NHNNNGGGGGGGGGVSGGG~~SVNNGYH~~RERDRSRHSHRSTH  
 PdStbm 1 MDTESVRSGRSERSERS~~QRSN~~RPYRNKSGRHSRERSH~~DRHRE~~RHHGDN~~HRNGGHD~~DTD

HvStbm 18 -----DDNWGETN~~ITITETA~~TSVCT  
 HsStbm1 58 STRGDER-----DDNWGETTTVVTG-TSEHS  
 HsStbm2 61 STRTEEVQ-----DDNWGETTTAITG-TSEHS  
 XlStbm 58 STRGDER-----DDNWGETTTVVTG-TSEHS  
 DmStbm 61 SSKSAKGFQRGDMAPYQTSVNMTGDGSHDQEVIEVQILPQDENWGEN~~TTAVTGNT~~SEQS  
 PdStbm 61 RDDRSVTIAPLPRSHHHSDVTVTQG-RNGEERIEVQIMPODENWGETTTAITGNTSETG

HvStbm 37 DLEVD~~MDGLFDDDD~~VEHRNFS~~CLNFKQ~~TL~~SI~~IFSIGLGI~~FAIL~~SPIAFLVMPN~~LIS~~NWK-  
 HsStbm1 83 ISHDDL~~T~~-RIAKDMEDSVPLDCS---RHLGVAAGATLALLSFLTP~~IAFILL~~PPLLRWEE-  
 HsStbm2 87 ISQEDIA-RISKDMEDSVGLDCK---RYLGLTVASFLG~~LLVFL~~PIAFILLPILWRDE-  
 XlStbm 83 ISHDDIT-RITKDMEDSAKLDCS---RHLGVV~~IAGAL~~ALLSFLTP~~IAFM~~LLPQILWRDE-  
 DmStbm 121 ISMEDINNMWHRES~~DKGFS~~FACR---RYV~~ESSFY~~FILGCGAFFSPVAMVMPYVGF~~FPSA~~  
 PdStbm 120 FSMEDMS-RINKEMEEGTGFNCE---RYMGS~~LVAGML~~GLVLAFLS~~PIAM~~VILPKLGLBEWE

HvStbm 96 -----T~~DS~~CAMTC~~GGMY~~ISIGV~~KEL~~VLLVGIWALYFRPTKAFMPRI~~DVF~~VG  
 HsStbm1 138 -----LEPCGTACEGLFISVAFKLLILLIGSWALFFRRPKASIPRV~~FV~~FRAL  
 HsStbm2 142 -----LEPCGTICEGLFISMAFKLLILLIGTWALFFRR~~RRAD~~MPRV~~FV~~FRAL  
 XlStbm 138 -----LEQCGTACEGLFISVAFKLLILLIGSWALFFRRPKAFFPRV~~FV~~FRAL  
 DmStbm 178 FDHPEITQTVRTQLLAC~~SEQCK~~QGLVSLAARLL~~LLA~~IGLWAV~~FR~~RTSATMPRI~~FL~~FRAL  
 PdStbm 176 QDP-----CGPECEGLLISFGSKL~~FILL~~IGTWALFFRRPKATMPRI~~FI~~FRAV

HvStbm 143 M~~LS~~IGYLVV~~TLF~~WLFYV~~IQ~~IFG-----K~~SSD~~LSGIVSFA~~LY~~FD~~S~~MFLIHYLALL  
 HsStbm1 185 LMVLFLLVVS~~Y~~WLFYGV~~R~~ILD-----A~~R~~ERSYQGV~~VQ~~FAVSLVDALL~~FV~~HYLAVV  
 HsStbm2 189 LLVLF~~FL~~FVVS~~Y~~WLFYGV~~R~~ILD-----S~~R~~DRNYQGV~~VQ~~YAVSLVDALL~~FV~~HYLAVV  
 XlStbm 185 LMVLFLLVVS~~Y~~WLFYGV~~R~~ILE-----S~~R~~DKNYQGV~~VQ~~YAVSLVDALL~~FV~~HYLAVV  
 DmStbm 238 VLLVLTCT~~FAY~~WLFY~~VQ~~V~~ING~~AKIVVETGGDAVDYKSLVGYAT~~NF~~VD~~TL~~LLFIHYVAVV  
 PdStbm 223 I~~L~~FLV~~FT~~FA~~F~~WLFYGV~~R~~IYK-----A~~K~~EKSYHNI~~V~~LYAVSLVD~~TL~~LLFIHY~~TA~~LI

HvStbm 194 LMWIRHQENIYNVSVIRNV~~D~~GRKHYMI~~G~~QCSIQKAAVNVLEKYYIDENEYNPYLPRPTS  
 HsStbm1 236 LLELRQLQPQFTLKVVRSTDGASRFYNVGHLSIQRVAVWILEKYYHDFPVYNPALLNLPK  
 HsStbm2 240 LLELRQLQPMFTLQVVRSTDGESRFYSLGHLSIQRAALVLENYKDF~~TI~~YNPNLLTASK  
 XlStbm 236 LLELRQLQPQFTIKVVRSTDGASRFYNIGHLSIQRVAVWILENYYHDFPVYNPALLNLPK  
 DmStbm 298 LLELRHQQPCYYIKIIRSPDGVSRSYMLGOLSIQRAAVVWLQHYVDFPIFNPYLERIPI  
 PdStbm 274 LLEVRQLQPQYAVRITRSPDGESHNYTAGOLSIQRLAVWCLEQYRDFQVYNPYLEHVS

HvStbm 254 RSKIN~~KE~~SNIKFYDL~~DNK~~MDMNGK~~N~~F~~S~~QQA~~S~~KAVIAAAAALGRK~~EGR~~NDRFYEELE~~EDR~~  
 HsStbm1 296 SVLAKK~~V~~SG----FKVYS~~L~~GEENSTNNSTGQSRAVIAAAAAR-RRDN~~SH~~NEY~~Y~~YEEAEHER  
 HsStbm2 300 FRAAK~~H~~MAG----LKVYN~~V~~D--GPSNNATGQSRAMIAAAAAR-RRD~~S~~SHNELY~~Y~~YEEAEHER  
 XlStbm 296 SILSK~~K~~MSG----FKVYS~~L~~GEENSTNNSTGQSRAVIAAAAAR-RRDN~~SH~~NEY~~Y~~YEEAEHER  
 DmStbm 358 SVSKSQ~~R~~NKISNSFKY~~Y~~EV~~D~~GVSN~~S~~QO-QS~~Q~~SRAVIAA~~N~~AR-RRD~~S~~SHNERFYEE~~H~~YER  
 PdStbm 334 RVPKLSG-----FKVYD~~L~~DGV~~Q~~SQTPATRSRA~~I~~FAAAAAR-RRD~~S~~SHNDRFYEE~~Q~~YER

Fig. S4 continued.

HvStbm 314 RVRKRKARLVAAAEAAFGHTARLNAEFTSKKANGSMNPDEAAQALFPPTIARPLQKYLRTT  
HsStbm1 351 RVRKRKARLVVAVEEAFTHIKRLEEEQ-KNPREVMDPREAAQAI FASMARAMQKYLRTT  
HsStbm2 353 RVRKRKARLVVAVEEAFTHIQRLQAEHQKAPGEVMDPREAAQAI FPSMARALQKYLRTT  
XlStbm 351 RVRKRKARLVVAVEEAFTHIKRLEDEDP-KNPREIMDPREAAQAI FASMARAMQKYLRTT  
DmStbm 416 RVRKRKARLITAAEEAFTHIKRLEHNEPA---PALPLDPQEAASAVFPSMARALQKYLRTT  
PdStbm 387 RVRKRKARLITAAEEAFTHIKRLEESG---PAIPMDPLEAAQAI FPSMARALQKYLRTT

HvStbm 374 RQQLHYPIESIMKHLAHCTMFDMSEARAFLERYTCDOFCVGY-VSSSQSDWTLISDFAAT  
HsStbm1 410 KQQPYHTMESILQHLFCITHDMTPKAFLERYLAAGPTIQYHKERWLAKOWTLVSEEPVT  
HsStbm2 413 RQONVHSMESILQHLAFCITNGMTPKAFLERYLSAGPTIQYDKDRWLSTQWRIVSDEAVT  
XlStbm 410 KQQPYHTMESILQHLFCITHDMTPKAFLERYLGPGPTIQYHKERWLAKOWTLVSEEPVT  
DmStbm 473 RQQPRHTFESILKHLAHCLKHDLSPRAFLEPYLTESPVMQSEKERRWVQSWSLICDEIVS  
PdStbm 444 RQQPRYTMENILQHLATCISCDQTPRAFLERYLTQGPVITWNDKDLRSTQTWVLICDQLLS

HvStbm 433 KQLSDGMIFQLQNDISLVVVVSRTPPIFKISEHAYDIDINRFILRLSSETSV  
HsStbm1 470 NGLKDGIVFILLKRQDFSLVVS TKKVPFFKLSEEFVDPKSHKFMRLQSETSV  
HsStbm2 473 NGLKDGIVFVLKCLDFSLVNVKKIPFII LSEEFIDPKSHKFMRLQSETSV  
XlStbm 470 NGLKDGIVFELKRQDFSLVVS TKKIPFFKLSEEFVDPKSHKFMRLQSETSV  
DmStbm 533 RPIGNECTFQLIQNDVSLMVTVHKLPHEFNLAEEVVDPKSNKFVLRNLNSETSV  
PdStbm 504 RAVKDGTVFQLRQGDVILLIIVRHLPHEFNVTTEEVIHPKNNKFVLRNLNSETSV

Fig. S4 continued.

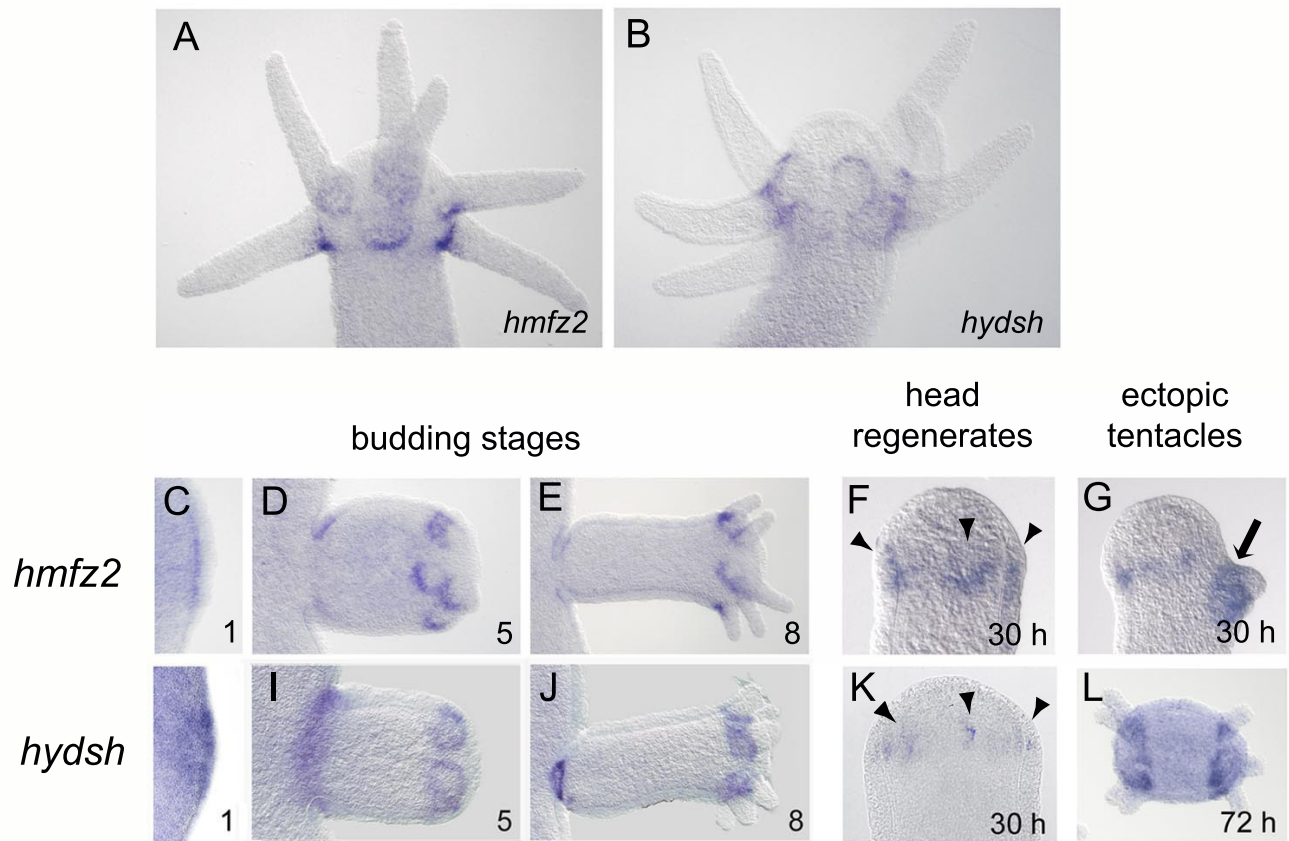

**Fig. S5.** Gene expression patterns of *hmfz2* and *hydsh* during tentacle and bud evagination. (a–l) Spatial and temporal expression patterns of *hmfz2* and *hydsh* are equivalent to the expression pattern of *hvwnt8* during tissue evagination (Fig. 2). (a and b) Expression of *hmfz2* and *hydsh* at the basis of tentacles in intact *Hydra* heads. (c–e and h–j) Expression of *hmfz2* and *hydsh* in the pallisading zone of early bud stages (c and h) and thereafter in those epithelial cells undergoing shape changes at the basis of evaginating tentacles and buds (d, e, i, and j). (f and k) Local up-regulation (arrow heads) of *hmfz2* and *hydsh* during initiation of tentacle regeneration in head regenerates. (g and l) Up-regulation of *hmfz2* and *hydsh* during the formation of ectopic body tentacles (arrow) in a wild-type head regenerate (g), and in an irregularly regenerating tissue piece from a multiheaded mutant (l). Numbers represent bud stages or regeneration times.

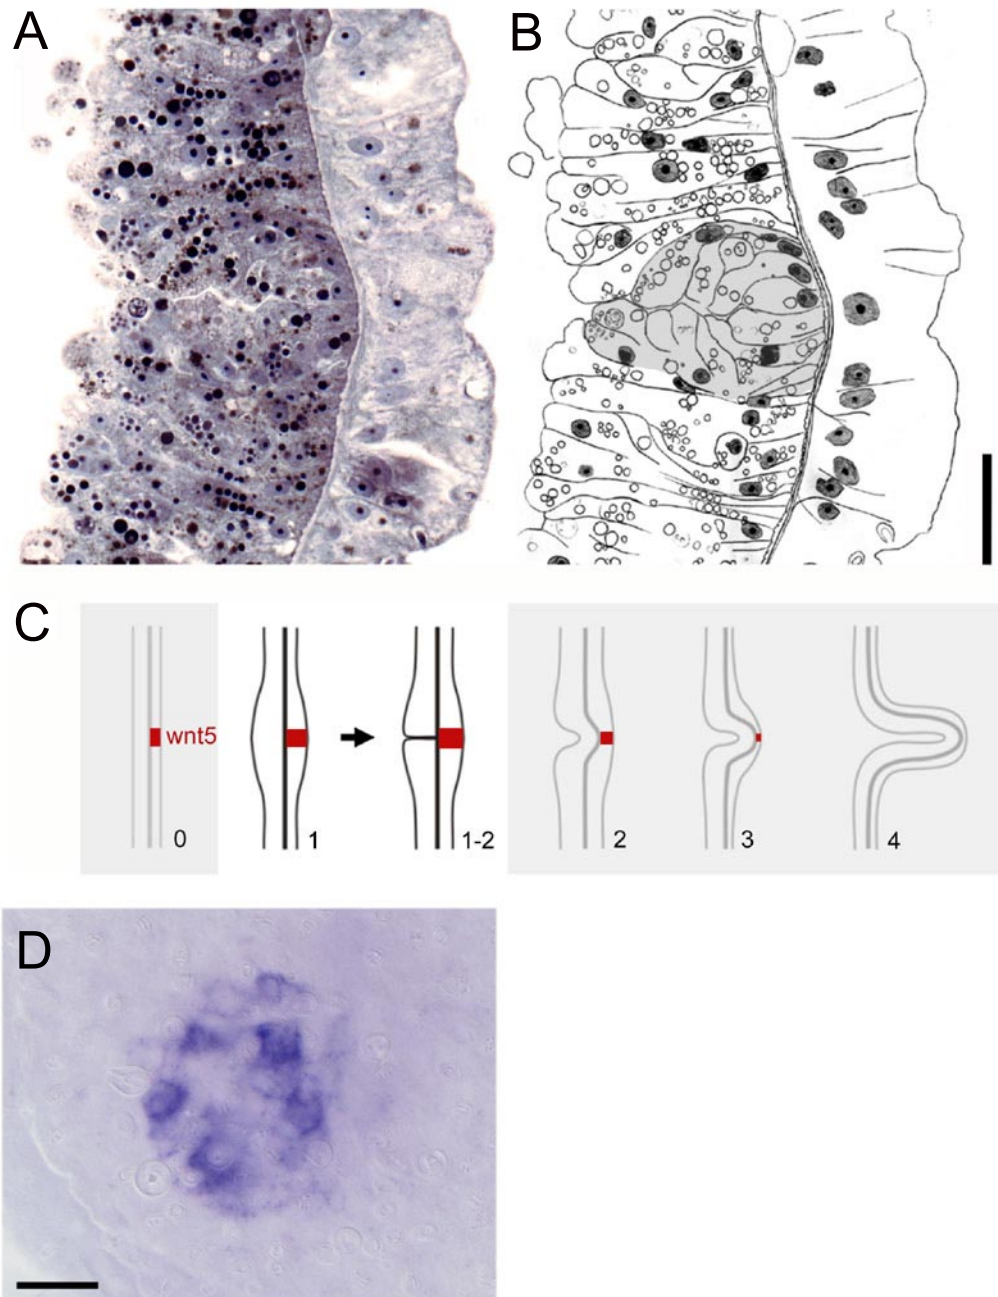

**Fig. S6.** Symmetry-breaking cell shape changes in the endodermal epithelium during bud initiation. (a–c) Gelei initially described those cell shape changes representing the first morphological sign of bud evagination (5). In a cluster of endodermal epithelial cells in the centre of the pallisading zone (shaded area in *b*), the cells substantially decrease their distal proximal diameter and increase their basal surface area. This leads to a symmetry-breaking curvature of the muscle layers toward the ectodermal side. (a) Histological 3- $\mu\text{m}$  sagittal section from the pallisading area of a stage 1–2 bud. (b) Schematic representation of this section outlining epithelial cell membranes, cell nuclei, and food vacuoles in the endodermal layer. (c) Schematic representation of the position of *hvwnt5*-expressing ectodermal epithelial cells throughout the early budding stages. (d) Magnified view of a *hvwnt5*-expressing cell cluster before evagination. In situ hybridization showing a representative *hvwnt5* expressing cluster of roughly 10 ectodermal epithelial cells just before tentacle evagination in a stage 5 bud. Initiation of tentacle and bud evagination occurs in a community, where strongly expressing *hvwnt5* cells are separated by cells exhibiting lower level of *hvwnt5* expression. Such 2D patterns have been theoretically explained by activation-inhibition systems, where several local activation maxima appear close to one other with initially small inhibition originating from each activation peak (6). (Scale bar, 20  $\mu\text{m}$ .)

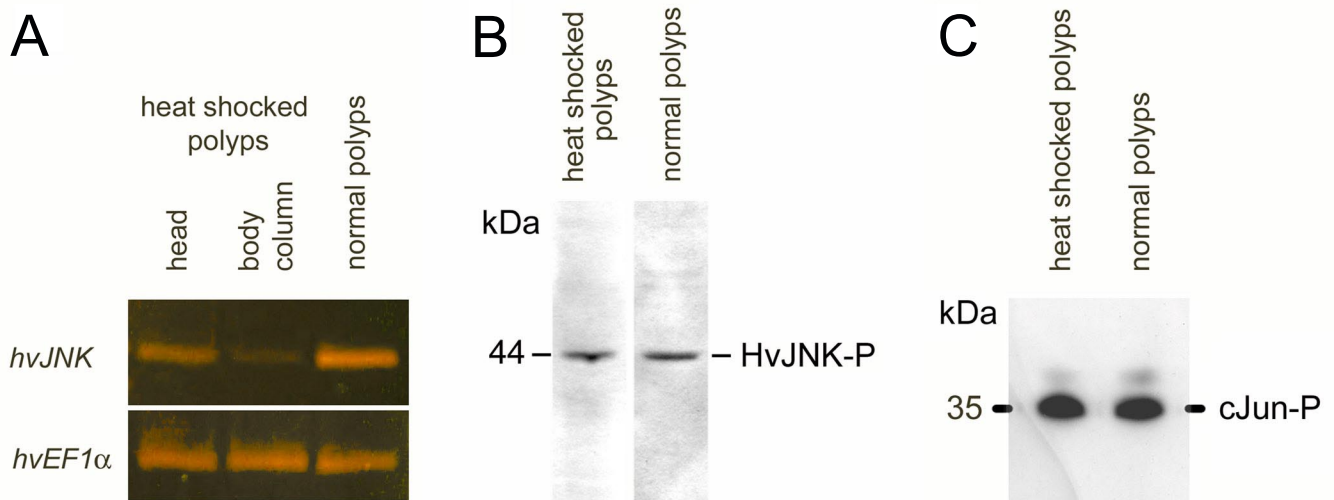

**Fig. S7.** Detection of JNK activity in the epithelium of *Hydra*. (a) Previously, strong *hvJNK* expression had been described in nests of differentiating nematocytes throughout the gastric region of *Hydra* and had not been detected in epithelial cells (7). Here, by using interstitial cell-free *Hydra*, *hvJNK* mRNA and JNK kinase activity were detected in the epithelial cell lineages. *H. magnipapillata* mutant strains sf-1 and A-10 were used due to their temperature-sensitive interstitial stem cell system. To eliminate all *hvJNK*-expressing nematocyte nests, polyps were incubated at 25 °C for 4 days and then transferred back to 18 °C for three more days under daily feeding. Total loss of interstitial stem cells and *hvJNK*-expressing nematocyte nests was controlled by maceration preparation and in situ hybridization. To detect *hvJNK* mRNA, RT-PCR was done by using RNA from head and gastric tissue of i-cell free *Hydra* and of normal nonshocked controls. Contamination from nuclear DNA is excluded by the presence of large introns in the genomic sequence between the primer pairs. PCR primers: JNK\_F-RT2, GGAATGGGATACTCTGAAAACG; JNK\_R-RT2, GTCGATTGGCACAGTACATACG; EF1a-Forw, GTATGGTTGCTTCTGACAGC; EF1a-Rev, TGTGAGCAGTGTGACAATCC. PCR conditions: 1 cycle, 95 °C for 3 min; 30 cycles, 95 °C for 45 sec, 55 °C for 45 sec, 72 °C for 1 min; 1 cycle, 72 °C for 2 min. (b) Detection of *Hydra* phosphoJNK was done by standard Western blotting using intact polyp tissues lysed in NuPAGE LDS sample buffer (Invitrogen) containing 1:100 phosphatase inhibitor (Sigma-Aldrich) and the phospho-SAPK/JNK (Thr-183/Tyr-185) antibody (9251, Cell Signaling Technology). (c) To detect HvJNK kinase activity in cell lysates from i-cell-free *Hydra*, a nonradioactive JNK Assay Kit (9810, Cell Signaling Technology) was used, which visualizes c-Jun phosphorylation in immunoblots. All procedures were carried out according to the kit protocol. It should be noted that the amounts of phospho-c-Jun detected were limited by the detection system and therefore do not represent JNK activity in a quantitative manner.



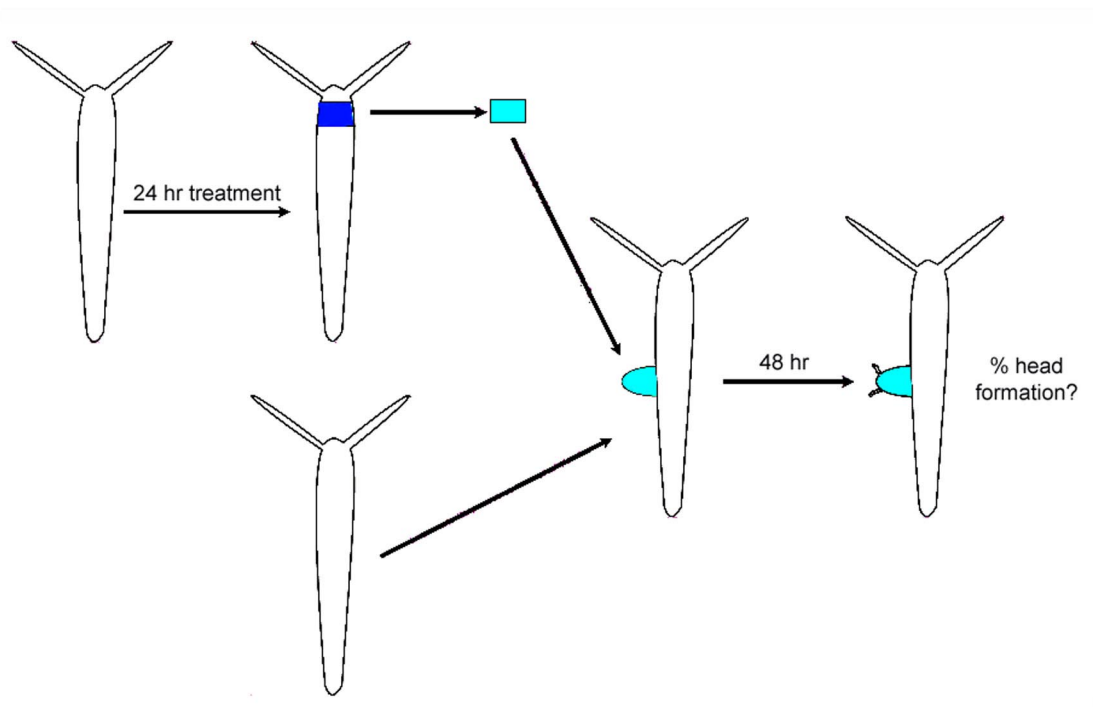

| treatment            | no. 2nd axes / no. grafts | 2nd axis formation[%] |
|----------------------|---------------------------|-----------------------|
| untreated controls   | 28/44                     | 64%                   |
| 25 $\mu$ M SP600125  | 29/44                     | 66%                   |
| 25 $\mu$ M ZTM000990 | 8/44                      | 18%                   |

**Fig. S8.** Effects of inhibitor treatments on the capacity for head activation. Treatment with the  $\beta$ -Catenin-specific inhibitor ZTM000990 strongly reduced the capacity of tissue pieces to induce a secondary axis, whereas treatment with the JNK-specific inhibitor SP600125 had no effect. Animals were treated with 25  $\mu$ M of either SP600125 or ZTM000990 for 1 day. Then, tissue pieces of about 1/8 of total body size were excised directly below the heads and transplanted into the middle of the gastric region of untreated hosts according to MacWilliams (8). Two days after successful grafting, transplants were assayed for the induction of secondary axes.

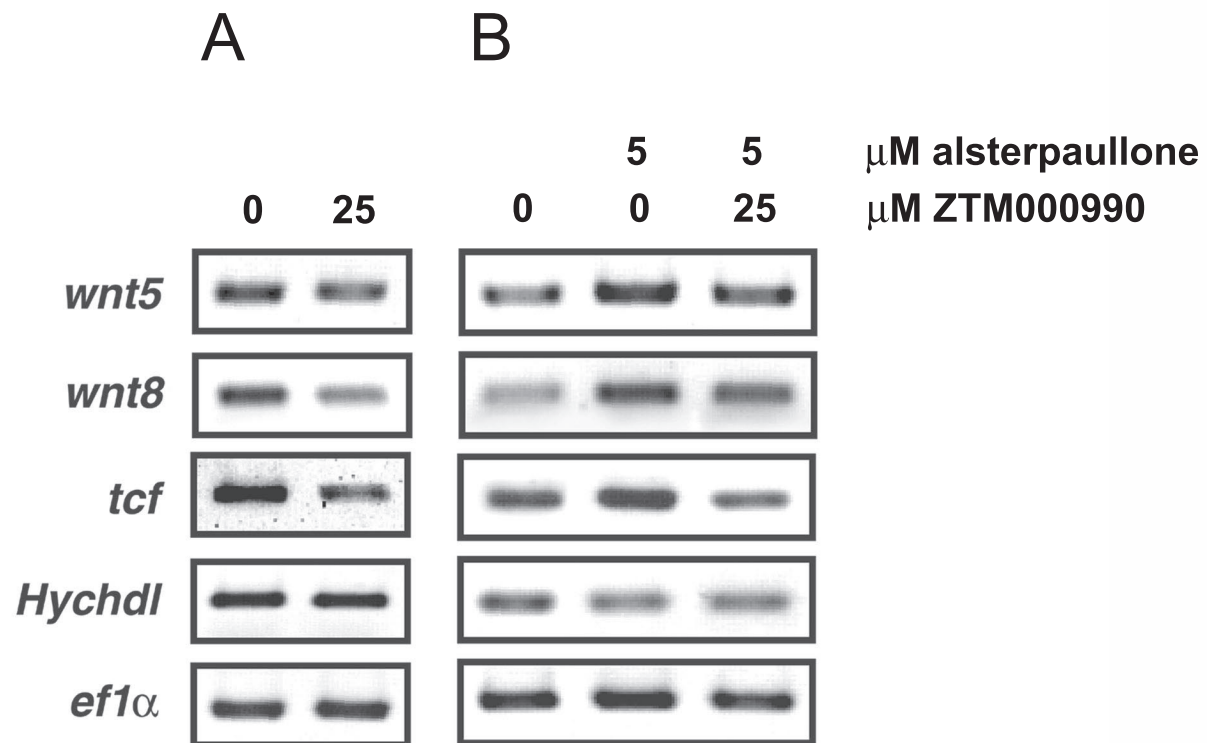

**Fig. 59.** Detection of the beginning of gene expression responses to alsterpaullone and ZTM000990 during the early phases of treatments. (a and b) RT-PCR-based detection of early gene expression responses following treatment with the GSK3 inhibitor alsterpaullone and the  $\beta$ -Catenin inhibitor ZTM000990. (a) In intact *Hydra* treated with 25  $\mu$ M ZTM000990, an initial decrease in the expression of *hvwnt5*, *hvwnt8*, and *hytcf* genes was detected after 48 h. Notably, no inhibitory effect on expression of the head organizer-specific chordin-like gene, *Hychdl* (9), was found. (b) In intact *Hydra* treated with 5  $\mu$ M alsterpaullone, *hvwnt5*, *hvwnt8*, and *hytcf* genes started to show up-regulation after 24 h. This stimulation was suppressed, when the polyps were cotreated with 5  $\mu$ M alsterpaullone and 25  $\mu$ M ZTM000990. Again, *Hychdl* gene expression levels were unaffected. *Hydra ef1α* gene expression levels were used to evaluate the amounts of target cDNA in both datasets.

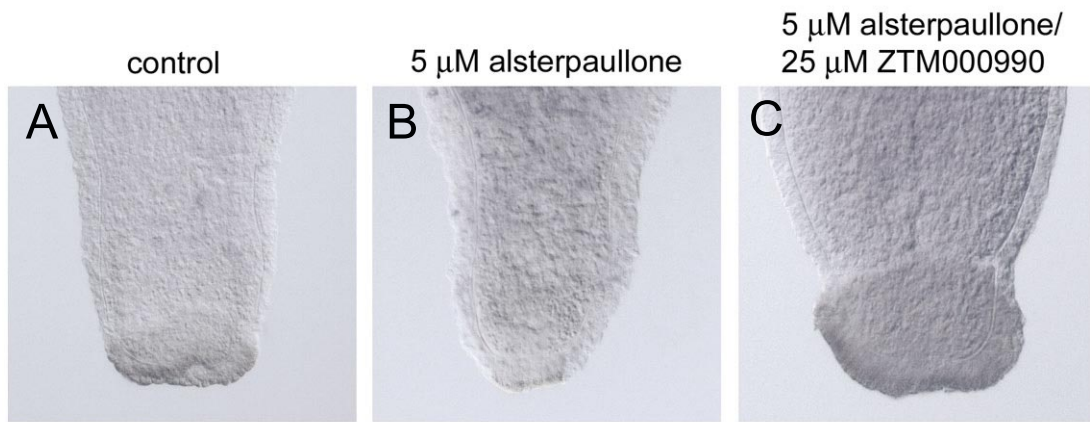

**Fig. 510.** Treatments with alsterpauellone and ZTM000990 affect foot patterning in *Hydra*. (a–c) Differentiation of foot-specific basal disk cells is altered depending on activation or inhibition of Wnt/ $\beta$ -Catenin signaling;  $\beta$ -Catenin stabilization by treatment with 5  $\mu$ M alsterpauellone results in a reduction of basal disk cells, while cotreatment with 5  $\mu$ M alsterpauellone and 25  $\mu$ M of the  $\beta$ -Catenin inhibitor ZTM000990 increases the amount of basal disk cells. Phenotypes were observed 60 h after the onset of treatment. Amino acid alignments were done by using ClustalW ([www.ebi.ac.uk/clustalw/](http://www.ebi.ac.uk/clustalw/)) and visualized by using the GeneDoc software ([www.psc.edu/biomed/genedoc/](http://www.psc.edu/biomed/genedoc/)). Conserved residues are shown with black background; semiconservative substitutions are shown in gray. (a) The predicted amino acid sequence of HvWnt8 shows similarity to members of the Wnt11 subfamily. In direct comparison, amino acid residues show identity to or similarity with members of either the Wnt8 (green color) or Wnt11 (blue color) subfamilies. Positions of the conserved cysteine residues are indicated in red. (c) Positions of 10 highly conserved cysteine residues specific for the extracellular Frizzled domain are indicated in red. Accession numbers: HvWnt8, AM279158; NvWnt11, AY687349; NvWnt8, AY792510; DmWnt11, NP\_571151; DmWnt8, AAC59697; XIWnt11, AAH84745; XIWnt8, CAA40510; HsWnt11, CAA74159; HsWnt8B, CAA71994; HvWnt5, AM263447; NvWnt5, AX725202; HsWnt5A, NM\_003392; HsWnt5B, NM\_030775; XIWnt5A, P31286; BfWnt5, AF361014; HmFz2, EU442372; NvFz2, XM\_001634945; MmFz5, NM\_022721; MmFz8, NM\_008058; DmFz2, NM\_079431; HvRok, AM263448; HsRok1, BAA75636; HsRok2, O75116; XIRok, AAC06351; DmRok, AAF03776; HvStbm, AM263457; HsStbm1, Q9ULK5; HsStbm2, Q8TAA9; XISStbm, AAK70879; DmStbm, AAC02533; PdStbm, CAJ26300. Hv, *H. vulgaris*; Hm, *H. magnipapillata*; Nv, *N. vectensis*; Pd, *Platynereis dumerilii*; Dm, *D. melanogaster*; Bf, *Branchiostoma floridae*; Dr, *Danio rerio*; Xl, *Xenopus laevis*; Mm, *M. musculus*; Hs, *H. sapiens*.
